# Supplementary material for: Cabozantinib in neuroendocrine tumors: tackling drug activity and resistance mechanisms
Source: PubMed Central journal article supplement (PMC10644769; doi:10.1530/erc-23-0232), 2023-10-18

A)

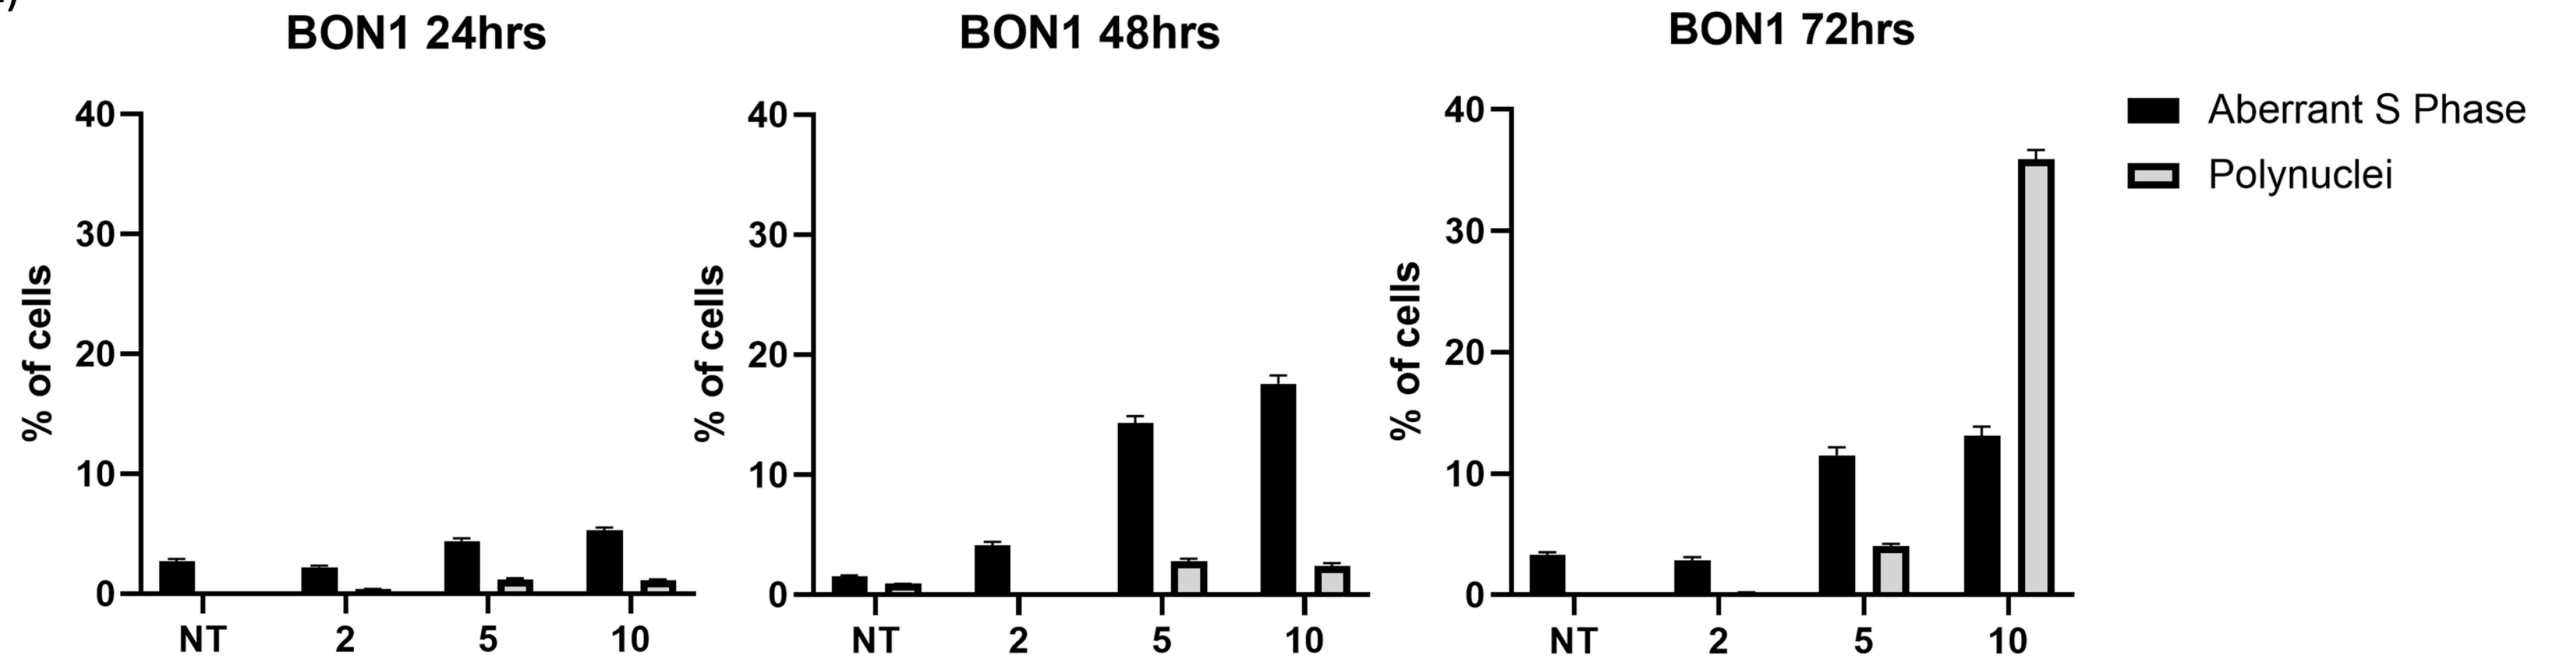

B)

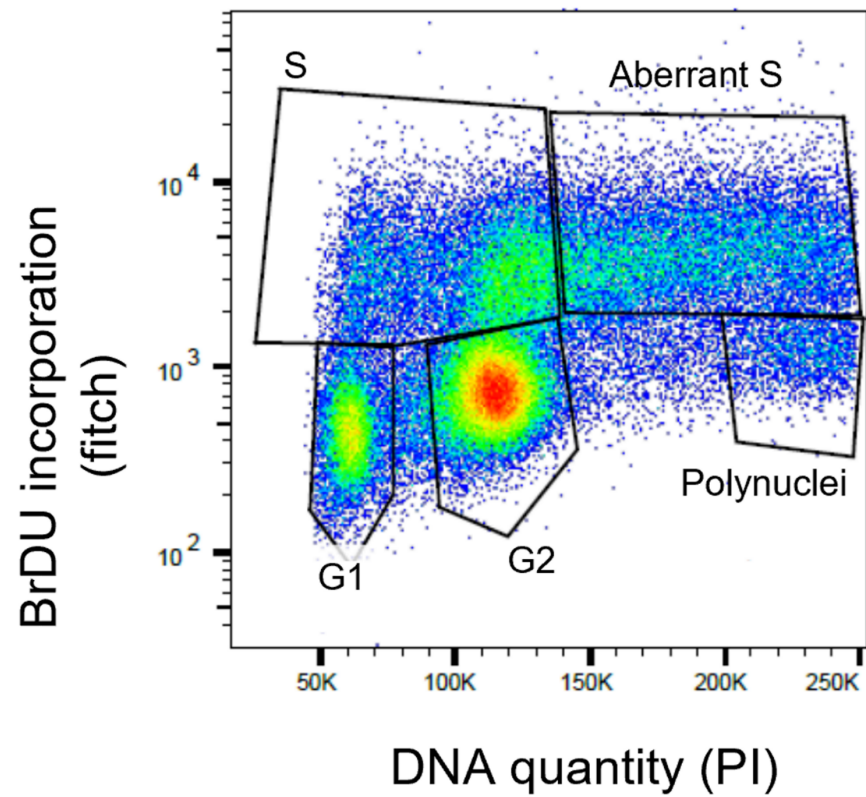

Supplement: supplementary_figure_1.pdf [file supplementary_figure_1.pdf]
