# Supplementary material for: Cabozantinib in neuroendocrine tumors: tackling drug activity and resistance mechanisms
Source: PubMed Central journal article supplement (PMC10644769; doi:10.1530/erc-23-0232), 2023-10-18

# Mice weight

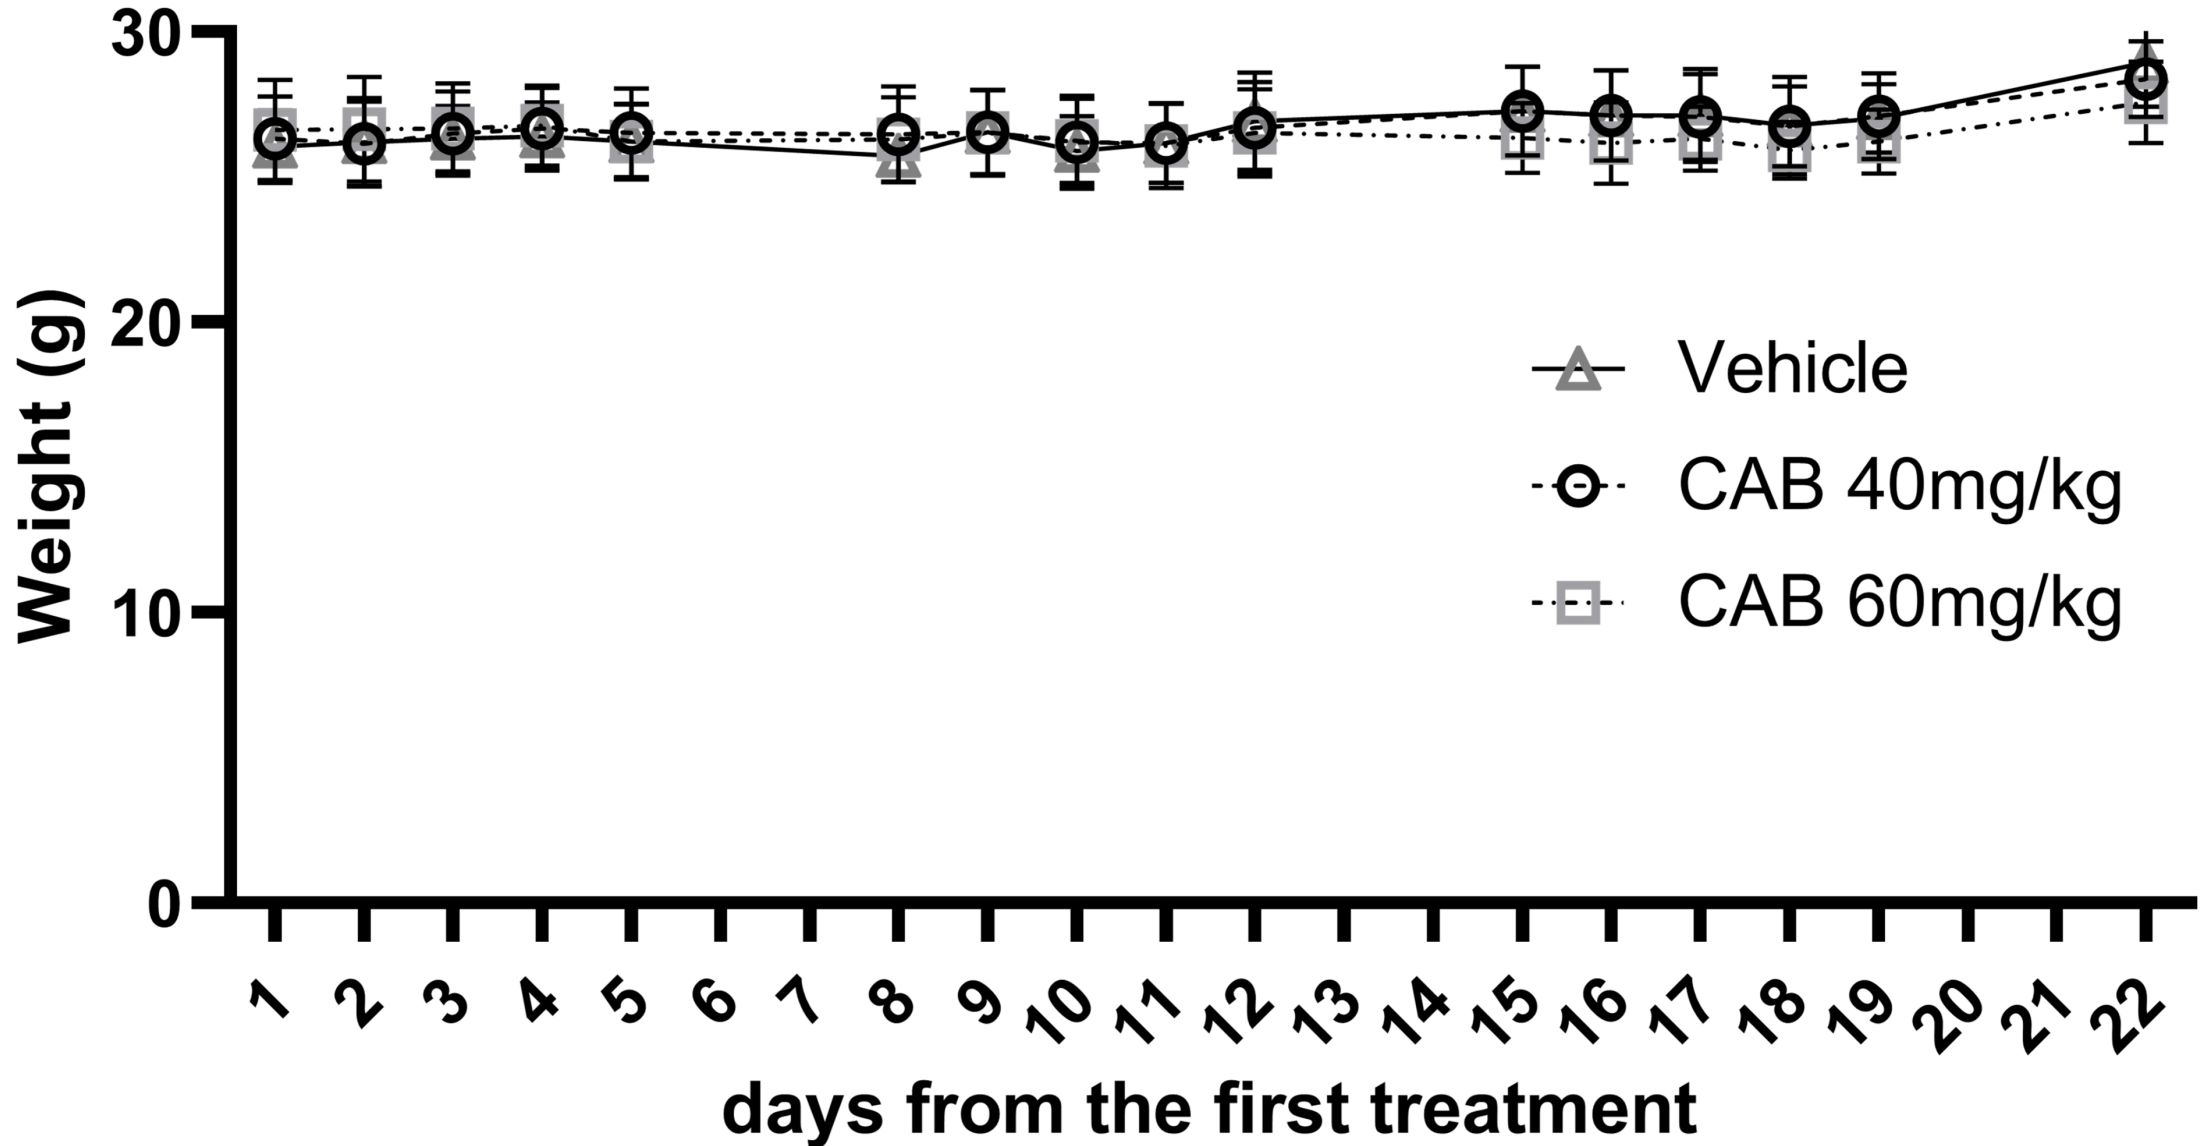

Supplement: supplementary_figure_2.pdf [file supplementary_figure_2.pdf]
