# Supplementary material for: Cabozantinib in neuroendocrine tumors: tackling drug activity and resistance mechanisms
Source: PubMed Central journal article supplement (PMC10644769; doi:10.1530/erc-23-0232), 2023-10-18

# Ematossilin/eosin

# KI67

# Caspase 3

NT

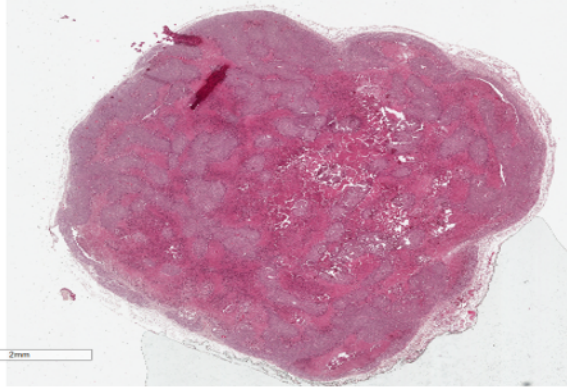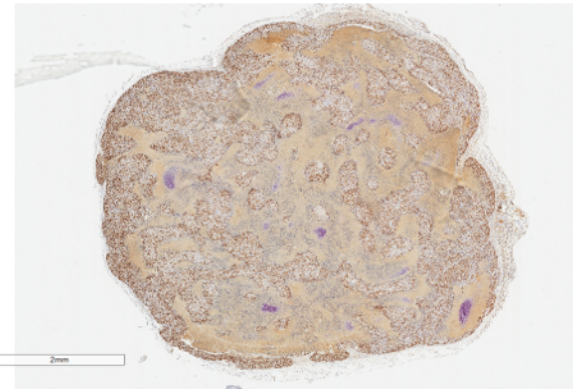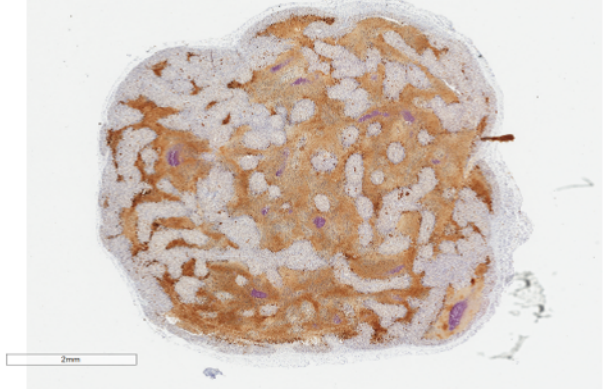

CAB 40  
mg/kg

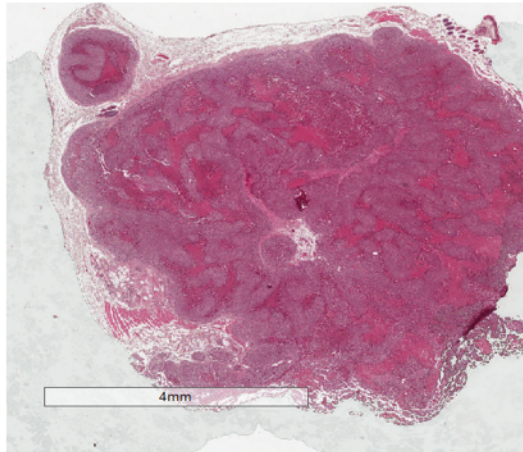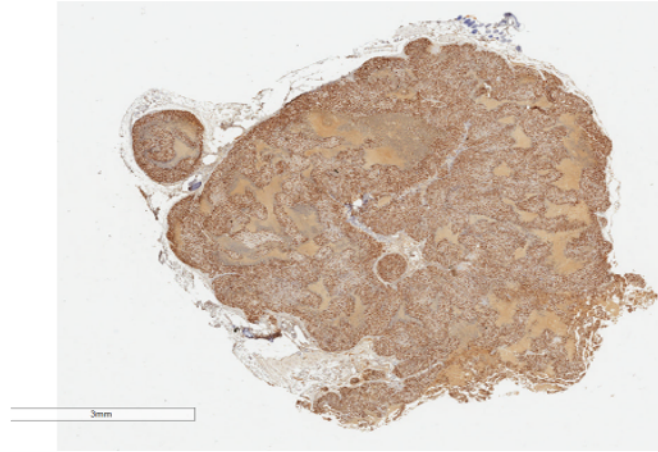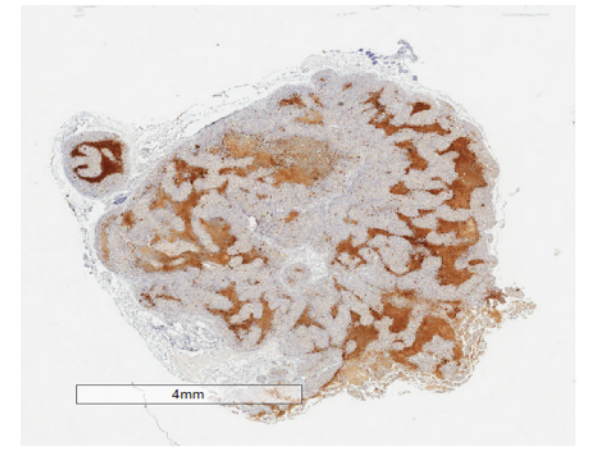

CAB 60  
mg/kg

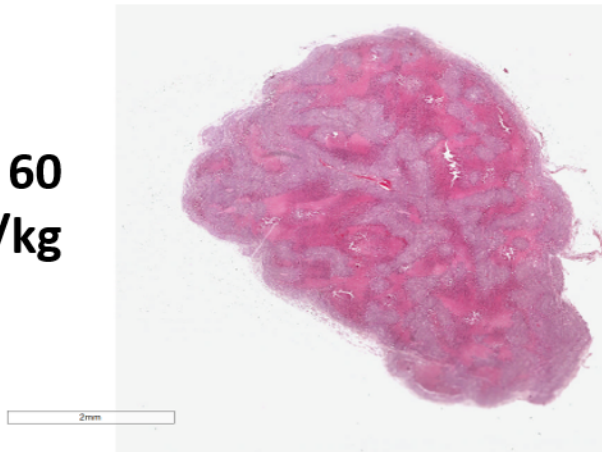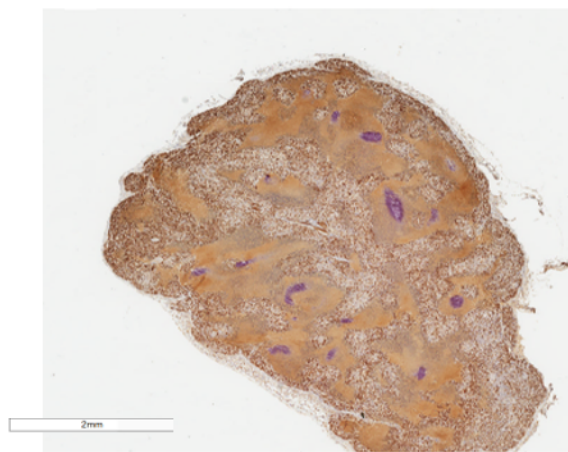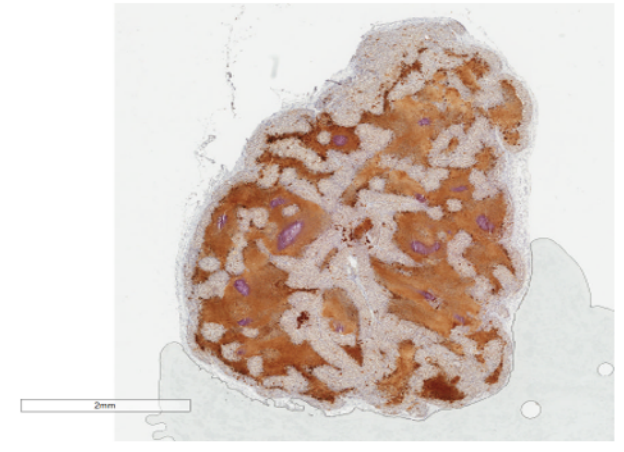

Supplement: supplementary_figure_3.pdf [file supplementary_figure_3.pdf]
