# Supplementary material for: Cabozantinib in neuroendocrine tumors: tackling drug activity and resistance mechanisms
Source: PubMed Central journal article supplement (PMC10644769; doi:10.1530/erc-23-0232), 2023-10-18
Supplement: supplementary_table_1.pdf [file supplementary_table_1.pdf]

| <b>BON1</b>     |                      |                      |                       |
|-----------------|----------------------|----------------------|-----------------------|
|                 | <b>NT vs 2μM CAB</b> | <b>NT vs 5μM CAB</b> | <b>NT vs 10μM CAB</b> |
| <b>G2 24hrs</b> | **** Pvalue <0.0001  | **** Pvalue <0.0001  | **** Pvalue <0.0001   |
| <b>G2 48hrs</b> | **** Pvalue <0.0001  | **** Pvalue <0.0001  | **** Pvalue <0.0001   |
| <b>G2 72hrs</b> | *** Pvalue 0.0002    | **** Pvalue <0.0001  | **** Pvalue <0.0001   |
| <b>NCI-H727</b> |                      |                      |                       |
|                 | <b>NT vs 2μM CAB</b> | <b>NT vs 5μM CAB</b> | <b>NT vs 10μM CAB</b> |
| <b>G2 24hrs</b> | ns Pvalue 0.0681     | **** Pvalue <0.0001  | **** Pvalue <0.0001   |
| <b>G2 48hrs</b> | **** Pvalue <0.0001  | **** Pvalue <0.0001  | **** Pvalue <0.0001   |
| <b>G2 72hrs</b> | ** Pvalue 0.001      | **** Pvalue <0.0001  | **** Pvalue <0.0001   |
| <b>NCI-H720</b> |                      |                      |                       |
|                 | <b>NT vs 2μM CAB</b> | <b>NT vs 5μM CAB</b> | <b>NT vs 10μM CAB</b> |
| <b>G2 24hrs</b> | ns Pvalue 0.1421     | **** Pvalue <0.0001  | **** Pvalue <0.0001   |
| <b>G2 48hrs</b> | **** Pvalue <0.0001  | **** Pvalue <0.0001  | **** Pvalue <0.0001   |
| <b>G2 72hrs</b> | **** Pvalue <0.0001  | **** Pvalue <0.0001  | **** Pvalue <0.0001   |

**Table S 1.** Two-way Anova test has been performed on G2/M values against untreated control. Table shows Pvalues, multiple comparisons and statistics referred to panel A fig 2.
